# Supplementary material
Source: PubMed Central journal article supplement (PMC3409791)
Supplement: 1209297109_pnas.1209297109_SI.pdf [file 1209297109_pnas.1209297109_SI.pdf]

# Supporting Information

Chodavarapu et al. 10.1073/pnas.1209297109

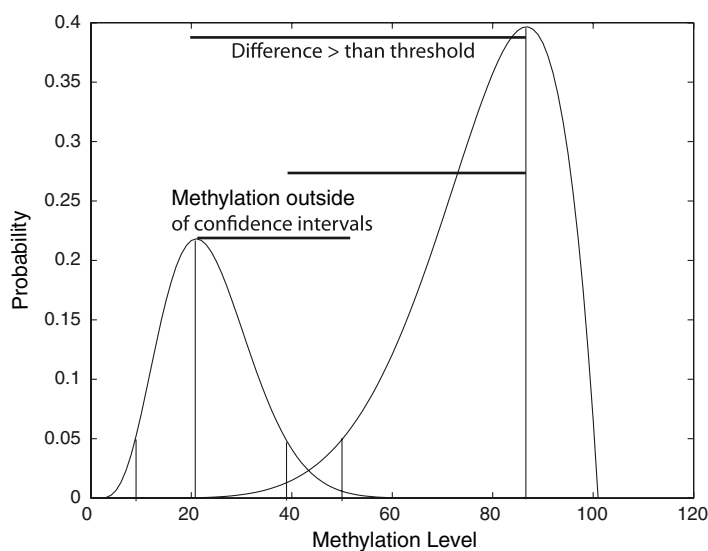

**Fig. S1.** Epimutation identification. The identification of epimutations (differentially methylated sites) requires that the implied methylation level of each sample be outside of the 5% confidence intervals based on a binomial distribution. It also requires that the methylation difference be greater than a threshold determined to be the overall mean of that context-specific methylation.

## Other Supporting Information Files

- [Dataset S1 \(XLSX\)](#)
- [Dataset S2 \(XLSX\)](#)
- [Dataset S3 \(XLSX\)](#)
- [Dataset S4 \(XLSX\)](#)
- [Dataset S5 \(XLSX\)](#)
- [Dataset S6 \(XLSX\)](#)
- [Dataset S7 \(XLSX\)](#)
- [Dataset S8 \(XLSX\)](#)
